# Supplementary material for: Provider Perceptions of the Impact of Rapid Whole Genome Sequencing on Care and Management
Source: Research Square preprint supplement (doi:10.21203/rs.3.rs-9173307/v1), 2026-04-10
Supplement: Supplementary file 1 [file d81d885b2b8d1fc584a9b0a7.xlsx]

## Sheet: Overall data
		All surveys										Positive Surveys										Uncertain surveys										Negative surveys
		Overall	%	NICU	%	PICU	%	CICU	%	Non-ICU	%	Overall	%	NICU	%	PICU	%	CICU	%	Non-ICU	%	Overall	%	NICU	%	PICU	%	CICU	%	Non-ICU	%	Overall	%	NICU	%	PICU	%	CICU	%	Non-ICU	%
Provider Credentials
MD		158	0.91	47	1	53	0.913793	29	1	29	0.74359	79	0.940476	21	1	30	0.967742	13	1	15	0.789474	30	0.857143	10	1	8	0.666667	7	1	5	0.833333	49	0.907407	16	1	15	1	9	1	9	0.642857
Fellow		15	0.09	0	0	5	0.0862069	0	0	10	0.25641	5	0.0595238	0	0	1	0.0322581	0	0	4	0.210526	5	0.142857	0	0	4	0.333333	0	0	1	0.166667	5	0.0925926	0	0	0	0	0	0	5	0.357143
Understanding of patients results
																																n=52		n=16
Explains ALL of symptoms		42	0.25	13	0.282609	15	0.267857	3	0.103448	11	0.289474	40	0.481928	12	0.571429	14	0.466667	3	0.230769	11	0.578947	1	0.0294118	0	0	1	0.0833333	0	0	0	0	1	0.0192308	1	0.0625	0	0	0	0	0	0
Explains SOME of symptoms		31	0.18	7	0.152174	12	0.214286	4	0.137931	8	0.210526	27	0.325301	6	0.285714	10	0.333333	4	0.307692	7	0.368421	2	0.0588235	0	0	1	0.0833333	0	0	1	0.166667	2	0.0384615	1	0.0625	1	0.0714286	0	0	0	0
MAY explain symptoms		28	0.17	5	0.108696	11	0.196429	7	0.241379	5	0.131579	9	0.108434	1	0.047619	4	0.133333	4	0.307692	0	0	19	0.558824	4	0.4	7	0.583333	3	0.428571	5	0.833333	0	0	0	0	0	0	0	0	0	0
Does NOT explain symptoms		68	0.4	21	0.456522	18	0.321429	15	0.517241	14	0.368421	7	0.0843373	2	0.0952381	2	0.0666667	2	0.153846	1	0.0526316	12	0.352941	5	0.5	3	0.25	4	0.571429	0	0	49	0.942308	14	0.875	13	0.928571	9	1	13	1
Results returned after discharge
Yes		32	0.36	5/47	0.106383	19	0.345455	6	0.206897	32	0.820513	26	0.317073	2	0.0952381	9	0.310345	1	0.0769231	14	0.736842	12	0.342857	2	0.2	3	0.25	2	0.285714	5	0.833333	24	0.45283	1	0.0625	7	0.5	3	0.333333	13	0.928571
No		108	0.64	42/47	0.893617	36	0.654545	23	0.793103	7	0.179487	56	0.682927	19	0.904762	20	0.689655	12	0.923077	5	0.263158	23	0.657143	8	0.8	9	0.75	5	0.714286	1	0.166667	29	0.54717	15	0.9375	7	0.5	6	0.666667	1	0.0714286
Clinical utility of genomic testing
Not useful at all		0	0	0	0	0	0	0	0	0	0	0	0	0	0	0	0	0	0	0	0	0	0	0	0	0	0	0	0	0	0	0	0	0	0	0	0	0	0	0	0
Not very useful		7	0.04	3/46	0.0652174	1	0.0172414	1	0.0344828	2	0.0512821	0	0	0	0	0	0	0	0	0	0	1	0.0285714	1	0.1	0	0	0	0	0	0	6	0.113208	2	0.133333	1	0.0666667	1	0.111111	2	0.142857
Neutral		25	0.15	6/46	0.130435	8	0.137931	4	0.137931	7	0.179487	2	0.0238095	0	0	2	0.0645161	0	0	0	0	10	0.285714	3	0.3	4	0.333333	3	0.428571	0	0	13	0.245283	3	0.2	2	0.133333	1	0.111111	7	0.5
Useful		59	0.34	17/46	0.369565	18	0.310345	14	0.482759	10	0.25641	22	0.261905	6	0.285714	6	0.193548	6	0.461538	4	0.210526	15	0.428571	4	0.4	6	0.5	3	0.428571	2	0.333333	22	0.415094	7	0.466667	6	0.4	5	0.555556	4	0.285714
Very useful		81	0.47	20/46	0.434783	31	0.534483	10	0.344828	20	0.512821	60	0.72	15	0.714286	23	0.741935	7	0.538462	15	0.789474	9	0.257143	2	0.2	2	0.166667	1	0.142857	4	0.666667	12	0.226415	3	0.2	6	0.4	2	0.222222	1	0.0714286
How did rWGS impact clinical management plan?
Clinical management was impacted		98/171	0.57	21/47	0.446809	40/56	0.696429	15/29	0.517241	23/39	0.589744	68/82	0.829268	15/21	0.714286	27/29	0.931034	10/13	0.769231	16/19	0.842105	9/35	0.257143	2/10	0.2	2/10	0.2	0	0	3/6	0.5	21/54	0.388889	4/16	0.25	8/15	0.533333	5/9	0.555556	4/14	0.285714
It did not change management		73	0.43	26	0.553191	16	0.285714	14	0.482759	17	0.435897	14	0.170732	6	0.285714	2	0.0689655	3	0.230769	3	0.157895	26	0.742857	8	0.8	8	0.8	6	0.857143	4	0.666667	33	0.611111	12	0.75	6	0.4	5	0.555556	10	0.71
Medical therapy initiated		22	0.13	2	0.0425532	7	0.125	4	0.137931	9	0.230769	20	0.243902	2	0.0952381	6	0.206897	4	0.307692	8	0.421053	2	0.0571429	0	0	1	0.1	0	0	1	0.166667	0	0	0	0	0	0	0	0	0	0
Medical therapy stopped		4	0.02	1	0.0212766	0	0	2	0.0689655	1	0.025641	4	0.0487805	1	0.047619	0	0	2	0.153846	1	0.0526316	0	0	0	0	0	0	0	0	0	0	0	0	0	0	0	0	0	0	0	0
Dietary change		7	0.04	0	0	4	0.0714286	0	0	3	0.0769231	5	0.0609756	0	0	2	0.0689655	0	0	3	0.157895	1	0.0285714	0	0	1	0.1	0	0	0	0	1	0.0185185	0	0	1	0.0666667	0	0	0	0
Avoidance of procedure/diagnostic test		24	0.14	4	0.0851064	13	0.232143	2	0.0689655	5	0.128205	15	0.182927	3	0.142857	6	0.206897	2	0.153846	4	0.210526	1	0.0285714	0	0	1	0.1	0	0	0	0	8	0.148148	1	0.0625	6	0.4	0	0	1	0.0714286
Early tracheostomy and/or gastrostomy tube placement		2	0.01	1	0.0212766	0	0	0	0	1	0.025641	2	0.0243902	1	0.047619	0	0	0	0	1	0.0526316	0	0	0	0	0	0	0	0	0	0	0	0	0	0	0	0	0	0	0	0
Referral to one or more specialists		36	0.21	7	0.148936	15	0.267857	5	0.172414	9	0.230769	30	0.365854	6	0.285714	13	0.448276	4	0.307692	7	0.368421	2	0.0571429	1	0.1	0	0	0	0	1	0.166667	4	0.0740741	0	0	2	0.133333	1	0.111111	1	0.0714286
	Cardiology	3/36	0.17
	Pulmonolgy	0/36	0
	Neurology	14/36	0.39
	Gastroenterology	2/36	0.06
	Genetics	19/36	0.53
	Immunology	2/36	0.06
	Rainbow Kids	2/36	0.06
	Other	12/36	0.33
One or more additional medical screening(s)		30	0.18	6	0.12766	11	0.196429	5	0.172414	8	0.205128	22	0.268293	3	0.142857	9	0.310345	2	0.153846	8	0.421053	4	0.114286	1	0.1	1	0.1	2	0.285714	0	0	4	0.0740741	2	0.125	1	0.0666667	1	0.111111	0	0
	Skeletal survey	3/30	0.1
	Hearing test	3/30	0.1
	Eye exam	5/30	0.166667
	Renal ultrasound	5/30	0.166667
	Brain MRI	5/30	0.166667
	Other	17/30	0.566667
Palliative care initiated		8	0.05	2	0.0425532	3	0.0535714	1	0.0344828	2	0.0512821	8	0.097561	2	0.0952381	3	0.103448	1	0.0769231	2	0.105263	0	0	0	0	0	0	0	0	0	0	0	0	0	0	0	0	0	0	0	0
Palliative care withdrawn		1	0.01	1	0.0212766	0	0	0	0	0	0	1	0.0121951	1	0.047619	0	0	0	0	0	0	0	0	0	0	0	0	0	0	0	0	0	0	0	0	0	0	0	0	0	0
Change in medical care unrelated to primary diagnosis		10	0.06	3	0.0638298	3	0.0535714	2	0.0689655	2	0.0512821	7	0.0853659	2	0.0952381	2	0.0689655	1	0.0769231	2	0.105263	1	0.0285714	0	0	0	0	1	0.142857	0	0	2	0.037037	1	0.0625	1	0.0666667	0	0	0	0
Shortened length of stay		6	0.04	1	0.0212766	3	0.0535714	0	0	2	0.0512821	3	0.0365854	1	0.047619	1	0.0344828	0	0	1	0.0526316	0	0	0	0	0	0	0	0	0	0	3	0.0555556	0	0	2	0.133333	0	0	1	0.0714286
Other		25	0.15	4	0.0851064	12	0.214286	5	0.172414	4	0.102564	12	0.146341	2	0.0952381	7	0.241379	2	0.153846	1	0.0526316	4	0.114286	1	0.1	2	0.2	0	0	1	0.166667	9	0.166667	1	0.0625	3	0.2	3	0.333333	2	0.142857
How did rWGS impact clinical care?
Clinical care was impacted		118/171	0.69	30/47	0.638298	41/56	0.732143	19/29	0.655172	26/39	0.666667	74/83	0.891566	20/21	0.952381	26/30	0.866667	0.923077	0.923077	16/19	0.842105	15/34	0.441176	2/10	0.2	5/11	0.454545	2/7	0.285714	6/6	1	27/54	0.5	8/16	0.5	10/15	0.666667	5/9	0.555556	4/14	0.285714
Provided clarity for the primary care team		89	0.52	26	0.553191	33	0.589286	13	0.448276	17	0.435897	60	0.722892	17	0.809524	22	0.733333	9	0.692308	12	0.631579	7	0.205882	1	0.1	2	0.181818	1	0.142857	3	0.5	22	0.407407	8	0.5	9	0.6	3	0.333333	2	0.142857
Changed management plan for consulting specialist		45	0.26	9	0.191489	19	0.339286	7	0.241379	10	0.25641	37	0.445783	9	0.428571	13	0.433333	6	0.461538	9	0.473684	5	0.147059	0	0	3	0.272727	1	0.142857	1	0.166667	3	0.0555556	0	0	3	0.2	0	0	0	0
Shortened length of time to diagnosis		42	0.25	15	0.319149	14	0.25	3	0.103448	10	0.25641	34	0.409639	13	0.619048	11	0.366667	3	0.230769	7	0.368421	4	0.117647	0	0	1	0.0909091	0	0	3	0.5	4	0.0740741	2	0.125	2	0.133333	0	0	0	0
Created more confusion for the care team		5	0.03	3	0.0638298	0	0	1	0.0344828	1	0.025641	1	0.0120482	0	0	0	0	0	0	1	0.0526316	3	0.0882353	2	0.2	0	0	1	0.142857	0	0	1	0.0185185	1	0.0625	0	0	0	0	0	0
Improved communication of outcome/prognosis with family		77	0.45	17	0.361702	29	0.517857	12	0.413793	19	0.487179	56	0.674699	13	0.619048	21	0.7	10	0.769231	12	0.631579	10	0.294118	1	0.1	3	0.272727	1	0.142857	5	0.833333	11	0.203704	3	0.1875	5	0.333333	1	0.111111	2	0.142857
The result was not helpful or did not change care		52	0.3	16	0.340426	14	0.25	10	0.344828	12	0.307692	8	0.0963855	1	0.047619	4	0.133333	1	0.0769231	2	0.105263	18	0.529412	8	0.8	6	0.545455	4	0.571429	0	0	26	0.481481	7	0.4375	4	0.266667	5	0.555556	10	0.714286
How did your patients rWGS result affect the family?
Family was impacted		144/156	0.92	41/41	1	49/55	0.890909	22/24	0.916667	31/37	0.837838	82/83	0.987952	20/20	1	29/31	0.935484	13/13	1	19/19	1	24/28	0.857143	8/8	1	9/11	0.818182	2/3	0.666667	5/6	0.833333	41/45	0.911111	13/13	1	11/12	0.916667	8/8	1	8/12	0.666667
Provided clarity for the family		96	0.62	25	0.609756	33	0.611111	15	0.625	23	0.621622	65	0.783133	16	0.8	24	0.774194	10	0.769231	15	0.789474	9	0.321429	1	0.125	3	0.272727	0	0	5	0.833333	22	0.488889	8	0.615385	6	0.5	5	0.625	3	0.25
Additional familial screening		30	0.19	3	0.0731707	14	0.259259	8	0.333333	5	0.135135	22	0.26506	2	0.1	11	0.354839	6	0.461538	3	0.157895	7	0.25	1	0.125	3	0.272727	1	0.333333	2	0.333333	1	0.0222222	0	0	0	0	1	0.125	0	0
Reproductive counseling/planning		30	0.19	11	0.268293	5	0.0925926	4	0.166667	10	0.27027	25	0.301205	11	0.55	4	0.129032	3	0.230769	7	0.368421	5	0.178571	0	0	1	0.0909091	1	0.333333	3	0.5	0	0	0	0	0	0	0	0	0	0
Family referred to services		25	0.16	8	0.195122	5	0.0925926	4	0.166667	8	0.216216	22	0.26506	8	0.4	4	0.129032	4	0.307692	6	0.315789	2	0.0714286	0	0	0	0	0	0	2	0.333333	1	0.0222222	0	0	1	0.0833333	0	0	0	0
Created more confusion for family		12	0.08	0	0	5	0.0925926	2	0.0833333	5	0.135135	3	0.0361446	0	0	2	0.0645161	1	0.0769231	0	0	4	0.142857	0	0	2	0.181818	1	0.333333	1	0.166667	5	0.111111	0	0	1	0.0833333	0	0	4	0.333333
Other		36	0.23	14	0.341463	9	0.166667	3	0.125	10	0.27027	8	0.0963855	3	0.15	1	0.0322581	1	0.0769231	3	0.157895	11	0.392857	6	0.75	4	0.363636	0	0	1	0.166667	17	0.377778	5	0.384615	4	0.333333	2	0.25	6	0.5
